# Supplementary material for: Preventive effect of cryotherapy on persistent chemotherapy-induced peripheral neuropathy after completion of weekly paclitaxel therapy for breast cancer
Source: Research Square preprint supplement (doi:10.21203/rs.3.rs-417227/v2), 2021-09-17
Supplement: Supplementary file 1 [file 2b3fa16ad1158916520d88c6.docx]

Supplemental Table1. Multivariate logistic regression analysis to evaluate the association between clinicopathological factors and the incidence of persistent CIPN.

| Factors |  | HR | 95% confidence interval | p value |
| --- | --- | --- | --- | --- |
| Age | 60> | 1 |  | <0.01 |
|  | 60=< | 29.7 | 2.25-391.6 |  |
| Cryotherapy | yes | 1 |  |  |
|  | no | 5.0 | 0.6-42.9 | 0.15 |
| Interval from end of paclitaxel therapy (year) |  | 0.6 | 0.1-3.8 | 0.58 |
| Height (cm) |  | 0.9 | 0.7-1.1 | 0.24 |
| Weight (kg) |  | 1.1 | 0.9-1.2 | 0.32 |
| Adjuvant hormone therapy | no | 1 |  | 0.36 |
|  | yes | 3.7 | 0.2-79.9 |  |
| Adjuvant radiotherapy | no | 1 |  | 0.93 |
|  | yes | 1.1 | 0.1-9.9 |  |

Abbreviations: CIPN; chemotherapy induced peripheral neuropathy, HR; hazard ratio.
